# Supplementary material for: Technical Note: A simple method for vaterite precipitation for isotopic studies: implications for bulk and clumped isotope analysis
Source: Copernicus journal article supplement (doi:10.5194/bg-12-3289-2015), 2015-06-03
Supplement: Supplementary file 1 [file bg-12-3289-2015-supplement-cover-letter.pdf › bg-12-3289-2015-supplement-cover-letter.pdf]

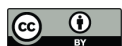

## *Supplement of*

# **Technical Note: A simple method for vaterite precipitation for isotopic studies: implications for bulk and clumped isotope analysis**

**T. Kluge and C. M. John**

*Correspondence to:* T. Kluge ([tobias.kluge@iup.uni-heidelberg.de](mailto:tobias.kluge@iup.uni-heidelberg.de))

- [bg-12-3289-2015-supplement-cover-letter.pdf](#)
- [Kluge-John-Vaterite-SupplementaryDatafile.xlsx](#)

The copyright of individual parts of the supplement might differ from the CC-BY 3.0 licence.
