# Supplementary material for: Technical Note: A simple method for vaterite precipitation for isotopic studies: implications for bulk and clumped isotope analysis
Source: Copernicus journal article supplement (doi:10.5194/bg-12-3289-2015), 2015-06-03
Supplement: Supplementary file 1 [file Kluge-John-Vaterite-SupplementaryDatafile.xlsx]

## Sheet: Machine 1 heated gases
Heated gases
date	HG name		d13C (pdb)	d18O (smow) raw	d47	D47 raw	d48	D48	49 param.
2012-04-13	HGS_CM6-230312		2.18914	37.942	17.8726	-0.747722	30.1181	4.33806	0.0593633
2012-05-08	HGS-MX(2)-230412		-3.35329	33.5873	8.03906	-0.819808	20.0622	2.9454	0.0465926
2012-05-09	HGS-HP-200212		-36.7611	9.33757	-48.3221	-1.26447	-34.4693	-4.42035	-0.0774305
2012-05-17	HGS-HP_130412		-36.7505	8.936	-48.7084	-1.27669	-36.0942	-5.30554	-0.101701
2012-05-21	HGS-MX_210512		-3.85596	32.9269	6.92202	-0.789291	18.599	2.78438	0.036
2012-05-23	HGS-CM_230512		2.175	37.5126	17.4465	-0.728239	28.4501	3.53994	0.0524946
2012-05-29	HGS-HP		-36.7624	9.55595	-48.12	-1.26452	-34.2652	-4.63585	-0.0701645
2012-05-30	HGS-MX		-19.4058	21.2323	-19.913	-1.0159	-8.42396	-1.29151	-0.0465966
2012-06-18	HGS-CMLarge_Hpsmall		-0.151	35.6479	13.3223	-0.71865	24.4845	3.28034	0.00336137
2012-06-20	HGS-CM-200612		2.20288	36.9835	16.9692	-0.710294	27.1621	3.30618	0.0053526
2012-06-22	HGS-HP		-36.7746	8.80588	-48.87	-1.29096	-36.8682	-5.84814	-0.11692
2012-07-16	HGS-CMLarge-Hpsmall		-9.96063	27.8522	-4.06361	-0.81205	7.17666	1.37305	-0.0190456
2012-07-16	HGS-HGMX1-230412		-0.459375	34.7362	12.283	-0.552	23.0655	3.65661	0.0194122
2012-07-16	HGS-CM large Hpsmall		-4.455	32.551	6.01	-0.747	18.238	3.164	0.002
2012-07-18	HGS_CMLarge_Hpsmall		-3.23088	33.5761	8.25831	-0.710069	20.5379	3.43448	0.0114214
2012-07-24	HGS-CMLargeHPLarge		-4.89088	29.9873	2.98281	-0.810497	12.1551	2.13908	0.00649038
2012-07-24	HGS-CM		2.18863	37.2853	17.3332	-0.63426	29.4219	4.92972	0.0342999
2012-07-30	HGS-CMlargeHPsmall		0.493625	36.647	14.9924	-0.674862	27.6278	4.41924	0.0209609
2012-08-16	HGS_-15		-19.1226	24.2338	-16.745	-0.948646	-2.39239	-0.798247	0.0332263
2012-08-16	HGS_CMLarge HPSmall		2.17088	37.8549	17.7736	-0.637963	30.0989	4.78033	0.0360476
2012-08-17	HGS_CM		0.364	35.0906	13.2618	-0.626231	23.6191	3.80144	0.0364838
2012-08-17	HGS-MX		2.13198	37.9515	17.8956	-0.576208	30.6524	5.13207	0.103494
2012-08-20	HGS_-17		-19.5295	22.7778	-18.6387	-1.03	-5.67915	-1.25417	-0.0207672
2012-08-21	HGS_+1		2.60325	19.4185	-0.376937	-0.845787	-13.772	-2.94042	-0.0206259
2012-08-24	HGS-XM		-1.53389	31.9012	8.12333	-0.733425	19.1679	5.63471	0.0324864
2012-08-29	HGS_+1		2.61963	19.5772	-0.117742	-0.760714	-13.0589	-2.53024	-0.0240843
2012-09-02	HGS-HP		-36.8028	9.0639	-48.8365	-1.3819	-38.0626	-7.2944	-0.074
2012-09-03	HGS-JME3A		-1.31591	24.8997	1.33352	-0.793621	-0.431979	-0.20937	0.0126064
2012-09-05	HGS-JMC5		2.71923	32.5869	13.0122	-0.687941	17.9142	3.03902	0.0458689
2012-09-12	HGS_HP_CM		2.15925	38.5774	18.4757	-0.644082	32.9607	6.17188	0.0239955
2012-09-17	HGS_HP		-36.8394	9.02475	-48.9583	-1.43534	-38.9025	-8.08607	-0.0565746
2012-10-01	HGS_HP		-36.97	8.79387	-49.3076	-1.43895	-38.7471	-7.47128	-0.130411
2012-10-03	HGS-HP		-36.7818	8.93275	-48.9849	-1.4286	-36.8935	-5.83173	-0.106356
2012-10-10	HGS-JMF2		-6.4113	21.6146	-6.95663	-0.896486	-7.71416	-1.08463	0.01
2012-10-16	HGS 12		5.92938	25.4051	8.9367	-0.723714	2.29069	1.49953	0.00321276
2012-10-25	HGS_+14		7.02325	25.7389	10.3409	-0.715374	2.24147	0.795145	0.0252855
2012-10-26	HGS_-15		-20.7224	24.1196	-18.5291	-1.07326	-2.32657	-0.503862	-0.0449569
2012-10-29	HGS-14		7.00675	26.5034	11.1221	-0.683264	3.95626	1.01636	0.0440388
2012-10-31	HGS-8		4.60725	23.9307	6.15488	-0.750699	-2.30673	-0.218711	-0.00709492
2012-11-07	HGS_-10		-36.6793	44.1508	-14.7336	-1.01759	45.9497	8.14638	-0.0164079
2012-11-13	HGS_+18		2.05812	33.8149	13.6116	-0.665556	21.3111	4.00211	0.0401521
2012-11-28	HGS_-25		-25.905	20.3981	-27.2311	-1.14913	-10.676	-1.61124	-0.0567063
2012-12-03	HGS_-15		-36.7073	39.48	-19.322	-1.10022	34.345	5.93332	-0.0192349
2012-12-14	HGS-+12		5.89175	25.5365	9.06474	-0.690887	1.27343	0.227373	-0.00430231
2012-12-18	HGS-24		-25.0556	20.5459	-26.2767	-1.15856	-10.2025	-1.42618	-0.0436387
2013-01-07	HGS-+9		4.3295	21.8796	3.83875	-0.751236	-7.51347	-1.44274	0.048279
2013-01-09	HGS_+17		2.11388	33.4979	13.3697	-0.64647	27.1376	10.3483	0.0492936
2013-01-12	HGS_-10		-36.6561	43.4743	-15.3324	-0.99012	47.001	10.4672	0.171611
2013-01-15	HGS_18/12		-36.5974	9.098	-48.6881	-1.46786	-38.926	-8.25521	-0.108374
2013-01-18	HGS_-7		-17.1349	28.6809	-10.5004	-0.976901	8.54731	1.44438	-0.0255425
2013-01-21	HGS_-12		-10.3216	18.6457	-13.7364	-0.975555	-15.4653	-3.09043	0.0056955
2013-01-24	HGS_-17		1.592	33.5455	12.8782	-0.674431	20.7026	3.92866	0.0277862
2013-01-28	HGS_-17		-36.714	40.0678	-18.7396	-1.07488	36.573	6.96061	-0.048944
2013-01-30	HGS_-17		1.92125	33.5836	13.262	-0.650886	20.4033	3.55896	0.0212426
2013-02-01	HGS_-12		-10.2614	19.1079	-13.2475	-0.999543	-14.7268	-3.24655	-0.0114005
2013-02-13	HGS_-9		11.8412	27.5765	16.964	-0.619256	5.23361	0.179535	-0.578748
2013-02-13	HGS_-9_2		11.8364	27.5797	17.0068	-0.575548	5.53247	0.470721	-0.462481
2013-02-15	HGS_-15		5.5195	32.5419	15.8008	-0.593074	18.8867	4.07354	-0.415997
2013-02-18	HGS_-25		-36.76	9.19625	-48.9151	-1.64217	-42.5372	-12.1735	-0.508212
2013-02-20	HGS-+17		1.83275	33.1781	12.8022	-0.620595	21.2479	5.17771	-0.166031
2013-02-21	HGS_-12		-10.3701	18.8878	-13.5664	-0.997199	-15.4707	-3.56862	-0.143198
2013-02-22	HGS_+17		-18.414	28.3836	-12.0745	-1.01584	8.3368	1.81905	-0.13118
2013-02-25	HGS_-12		-36.5906	31.0506	-27.4283	-1.24264	14.3722	2.6881	-0.165533
2013-02-26	HGS HP		-36.7555	9.08887	-48.9776	-1.60422	-41.2928	-10.6792	-0.288724
2013-02-27	HGS_HP		-36.7563	9.442	-48.5827	-1.54377	-40.5662	-10.6209	-0.209102
2013-04-16	HGS -33		-36.85	23.86	-34.672	-1.371	-3.325	-0.926	0.022
2013-04-17	HGS -33		-36.85	23.88	-34.675	-1.391	-3.154	-0.794	0.029
2013-04-17	HGS_+24		3.84	40.06	21.778	-0.498	38.082	8.275	0.069
2013-04-18	HGS -9		-3.31	15.55	-10.017	-0.936	-24.088	-5.821	0.082
2013-04-18	HGS -9		-3.31	15.56	-10.016	-0.942	-23.741	-5.483	0.08
2013-04-19	HGS_+8		-5.5	33.95	6.318	-0.714	22.751	5.179	0.1
2013-04-26	HGS+17		1.73	28.43	7.87353	-0.703616	9.665	2.97	0.018
2013-04-29	HGS_CM		1.73	29.21	8.692	-0.677	10.996	2.775	0.067
2013-05-06	HGS_-2		-21.1	27.15	-7.03	-0.908	6.287	2.164	0.051
2013-05-08	HG-16		-17.78	20.81	-18.975	-1.137	-10.06	-1.819	-0.019
2013-05-16	HGS+10		1.16	26.67	5.576	-0.711	5.175	1.929	0.349
2013-05-19	HG		-36.75	8.83	-49.251	-1.641	-40.194	-9.036	-0.095
2013-05-20	HGS		-36.7	9.02	-48.99	-1.61	-39.941	-9.155	-0.104
2013-05-22	HGS+14		2.44	29.34	9.50715	-0.672575	11.268	2.789	0.022
2013-05-24	HGS+10		2.76	25.43	5.924	-0.681	2.383	1.562	0.309
2013-05-25	HGS-3		-13.99	28.46	-7.615	-0.941	8.99	2.31	0.145
2013-05-29	HGS_-33		-36.79	8.87	-49.265	-1.656	-41.372	-10.336	0.082
2013-06-03	HGS+10		-0.61	26.83	3.964	-0.764	4.994	1.436	0.181
2013-06-06	HGS_+14		1.06	29.99	8.853	-0.644	13.261	3.506	0.206
2013-06-05	HG+15		3.4	30.49	11.644	-0.627	14.315	3.564	0.086
2013-06-20	HGS_Carrara		1.74	32.12	11.665	-0.618	18.522	4.554	0.251
2013-06-25	HGS_HP		-36.73	8.99	-49.092	-1.651	-41.051	-10.23	0.038
2013-06-28	HGS-CM		1.86	31.37	10.9921	-0.647719	16.426	3.942	-0.002
2013-07-01	HGS		0.409	32.86	11.0825	-0.642805	20.476	5.034	0.014
2013-07-05	HGS_CM		2.09	32.7	12.577	-0.622	20.213	5.088	0.015
2013-07-02	HGS_+11		0.67	29.19	7.631	-0.686	10.899	2.722	0.142
2013-07-08	HGS_+11		1.05	28.05	6.874	-0.681	8.159	2.204	0.124
2013-07-10	HGS+11		6.2	23.97	7.74475	-0.695653	-2.674	-0.671	-0.006
2013-07-12	HGS_-33		-36.78	8.94	-49.283	-1.747	-42.776	-11.914	-0.078
2013-07-15	HGS_-4		-14.62	27.63	-8.96626	-1.01776	6.806	1.556	-0.059
2013-07-26	HGS_-30		-30.44	19.61	-32.805	-1.61	-15.084	-4.503	0.058
2013-07-28	HGS_+20		0.79	32.54	11.18	-0.591	20.754	5.94	0.228
2013-07-28	HGS_+5		-10.74	33.86	0.995	-0.826	24.178	6.778	0.12
2013-07-29	HGS_+15		2.8	30.16	10.744	-0.624	13.777	3.67	0.133
2013-07-29	HGS_HP		-36.84	8.83	-49.697	-2.014	-44.877	-13.868	-0.071
2013-07-29	HGS_+7		3.28	31.61	12.756	-0.523	18.634	5.653	0.427
2013-07-30	HGS -24		-28.18	22.23	-27.978	-1.494	-8.38	-2.866	0.009
2013-07-31	HGS_+15		2.54	28.67	8.97466	-0.641897	9.76	2.58	-0.036
2013-08-09	HGS_+9		4.14	32.04	14.023	-0.534	29.176	5.43	0.111
2013-08-12	HGS_-33		-36.84	8.67	-49.864	-2.027	-24.286	2.15	-0.084
2013-08-14	HGS_-33		-36.85	8.77	-49.749	-2.002	-45.036	-13.91	-0.103
2013-08-16	HGS_+10		6.6	23.9	8.132	-0.67	-3.224	-1.09	0.072
2013-08-19	HGS_+11		6.87	24.33	8.858	-0.632	-1.093	-1.874	0.197
2013-08-21	HG_+19		1.44	33.84	13.155	-0.552	6.971	-0.258	0.01
2013-08-23	HGS_-33		-36.9667	8.69637	-49.8627	-2.02695	-45.52	-14.27	-0.133
2013-08-28	HGS_+11		6.78	24.26	8.703	-0.629	-2.23	-0.79	0.077
2013-08-30	HGS_+19		1.39	34.86	14.158	-0.522	27.26	7.82	0.095
2013-09-02	HGS_-33		-36.89	8.79	-49.849	-2.014	-45.19	-13.99	-0.112
2013-09-08	HGS +18		0.61	33.04	11.519	-0.58	23.19	7.36	0.25
2013-09-09	HGS_+11		6.04	23.74	7.417	-0.669	7.93	-1.3	0.05
2013-09-11	HGS_-4		-14.69	29.28	-7.537	-0.995	11.65	3.34	0.102
2013-09-24	HGS_+12		5.75	24.09	7.58	-0.59	-4.247	-2.488	-0.048
2013-09-24	HGS_-33		-36.76	8.85	-50.227	-2.679	-58.52	-28	-0.078
2013-10-09	HGS_-33		-36.83	8.8	-50.359	-2.695	-59.036	-28.428	-0.09
2013-10-10	HGS_+10		6.57	23.69	7.924	-0.629	-6.839	-4.293	-0.113
2013-10-11	HGS_+17		1.61	32.03	11.677	-0.401	25.906	12	0.318
2013-10-17	HGS+17		1.85	31.32	11.11	-0.483	22.537	10.077	-0.02
2013-10-21	HGS_-33		-31.34	16.72	-37.189	-2.368	-33.629	-17.681	-0.197
2013-10-24	HGS		1.54	27.34	6.614	-0.708	7.139	2.588	-0.109
2013-10-26	HGS_-23		-26.14	23.05	-25.622	-1.838	-8.496	-4.453	0.009
2013-11-02	HGS_-15		-2.89	10.44	-15.33	-1.518	-58.896	-31.445	-0.182
2013-11-05	HGS_0		2.53	18.25	-1.721	-0.943	-27.512	-14.574	-0.049
2013-11-09	HGS		-36.82	8.83	-50.516	-2.888	-61.941	-31.481	-0.038
2013-11-14	HGS-7		-1.71	15.98	-8.222	-1.104	-34.262	-17.023	0.045
2013-11-19	HGS_+16		6.43	25.8	10.037	-0.499	1.795	0.232	-0.058
2013-11-26	HGS +15		-2.39	16.14	-8.87	-1.266	-33.963	-17.032	-0.139
2013-12-02	HGS +17		1.47	33.16	12.641	-0.425	29.366	13.198	-0.081
2013-12-07	HGS_-9		-2.09	14.88	-9.873	-1.297	-42.519	-23.308	-0.162
2014-01-21	HGS-HP		-36.82	8.95	-50.263	-2.751	-58.032	-27.683	-0.261
2014-01-22	HGS_HP		-36.68	9.25	-49.844	-2.746	-56.923	-27.108	-0.218
2014-01-22	HGS_ICM		1.94	31.96	11.893	-0.437	24.535	10.785	-0.012
2014-01-25	HGS_+17		1.66	33.46	13.175	-0.372	31.322	14.546	-0.046
2014-01-28	HGS_ICM		2.11	33.13	13.274	-0.383	29.303	13.208	0.116
2014-02-06	HGS_HP		-36.94	8.57	-50.959	-2.979	-63.78	-32.878	-0.079
2014-02-12	HGS		2.12	33.78	13.942	-0.366	32.048	14.632	-0.145
2014-02-17	HGS		-22.35	29.98	-14.846	-1.532	17.129	7.447	-0.125
2014-02-21	HGS_ICM		1.35	35.9	15.279	-0.392	38.853	17.151	-0.086
2014-02-26	HGS_HP		-36.88	8.7	-50.684	-2.881	-61.124	-30.383	-0.18
	from	to	slope	intercept
moving averages	2013-09-24	2013-10-24	0.0364574	-0.900122
	2013-09-24	2013-10-24	0.0364574	-0.900122
	2013-09-24	2013-11-08	0.0365198	-0.903518
	2013-09-24	2013-11-09	0.0371912	-0.904394
	2013-09-24	2013-11-10	0.0371912	-0.904394
	2013-09-24	2013-11-16	0.037323	-0.893328
	2013-09-24	2013-11-20	0.0373874	-0.890861
	2013-09-24	2013-11-23	0.0373874	-0.890861
	2013-09-26	2013-11-25	0.0373874	-0.890861
	2013-10-03	2013-12-02	0.0373477	-0.89471
	2013-10-06	2013-12-05	0.0373477	-0.89471
	2013-10-10	2013-12-09	0.0388518	-0.898941
	2013-10-15	2013-12-14	0.0389787	-0.894996
	2013-10-20	2013-12-19	0.038788	-0.900091
	2013-10-27	2013-12-26	0.0390498	-0.885732
	2013-11-02	2014-01-01	0.039353	-0.889041
	2013-11-07	2014-01-06	0.0392814	-0.885951
	2014-01-21	2014-02-20	0.0384268	-0.899955
	2014-01-21	2014-02-21	0.0381564	-0.911707
	2014-01-21	2014-02-21	0.0381564	-0.911707
	2014-01-21	2014-02-24	0.0381564	-0.911707
	2014-01-21	2014-02-27	0.0382955	-0.91317
	2014-01-21	2014-03-08	0.038215	-0.912315
	2014-01-21	2014-03-14	0.038134	-0.916106
	2014-01-21	2014-03-19	0.0381409	-0.916183
	2014-01-22	2014-03-23	0.0387227	-0.922964

## Sheet: Machine 1- equilibrated gases
Equilibrated gases
RAW DATA										Linearity corrected
Equilibrated gases 25°C
date	HG name	d13C (pdb)	d18O (smow) raw	d47	D47 raw	d48	D48	49 parameter		D47
2012-05-09	EQS-090512	-36.171	56.0453	-1.77706	-0.0795633	71.544	9.409	0.058		-0.0646415
2012-05-09	EQS-090512 B	-36.6326	56.0629	-2.20211	-0.0598579	71.769	9.59	0.084		-0.041367
2012-05-24	EQGXX_25_24-05-12	-36.625	55.669	-2.577	-0.064	71.357	9.955	0.074		-0.0423612
2012-06-07	EQGS-25_070612	-36.5153	33.5608	-23.871	-0.243211	20.263	3.331	-0.007		-0.0427686
2012-06-07	EQGS-25_080612	-36.5744	55.7719	-2.43351	-0.07026	71.922	10.29	0.073		-0.0498261
2012-06-11	EQGS-25_110612	-36.5313	33.6198	-23.8349	-0.248269	36.195	6.12	0.502		-0.048129
2012-08-17	EQGS_25_tap	-36.8321	33.5635	-24.3033	-0.267279	20.338	3.692	-0.026		0.032097
2012-08-23	EQGS_25_equiH20	-36.7141	55.4944	-2.94465	-0.0715742	74.303	13.359	0.028		-0.0353011
2012-09-06	EQGS_25_evapH20	-36.6531	54.5635	-3.75273	-0.0465462	72.071	13.038	0.015		-0.00031887
2012-09-11	EQGS_25_evapH20	-36.6651	50.156	-8.11403	-0.16517	60.275	10.311	-0.032		-0.0652184
2012-09-17	EQGS_25_equiH20	-36.7419	32.3158	-25.4629	-0.319402	18.134	3.944	0.171		-0.00574079
2012-10-05	EQS 25C	-36.6794	52.7105	-5.61767	-0.106759	66.278	11.1111	0.021		-0.0375589
2012-11-16	EQS-25C	-36.7434	31.3914	-26.3783	-0.347164	15.314	2.957	-0.05		-0.0222269
2012-12-13	EQS-25C	-36.6875	48.6707	-9.53712	-0.139778	57.37	10.396	-0.004		-0.0222967
2013-01-17	EQS-25C	-36.6717	41.6058	-16.382	-0.219912	40.864	8.148	-0.025		-0.0181127
2013-01-25	EQS-25C	-36.695	32.8371	-24.9343	-0.337446	19.083	3.866	-0.04		-0.0302977
2013-03-01	EQS-25C	-36.6865	27.1444	-30.5353	-0.489641	2.84	-1.165	-0.149		-0.0201945
2013-04-22	EQS25	-36.69	49.72	-8.478	-0.14	14.032	-2.407	0.056		0.000532719
Equilibrated gases 50°C
date	HG name	d13C (pdb)	d18O (smow) raw	d47	D47	d48	D48	49 parameter
41061	EQGS-50C_010612	-36.6024	28.91	-28.5028	-0.328919	9.832	2.061	-0.005		-0.0895833
2012-06-12	EQGS-50_120612	-36.6212	28.7767	-28.715	-0.396685	8.751	1.248	-0.01		-0.155568
2012-06-21	EGS-50C	-36.6105	48.7456	-9.37305	-0.227435	55.904	8.559	0.015		-0.14873
2012-07-26	EGS-50C-Tap	-36.8456	29.3919	-28.3956	-0.450278	12.209	3.482	-0.057		-0.153831
2012-07-27	EGS-50C-Evap	-36.6418	50.2244	-8.00581	-0.249559	60.771	10.36	0.02		-0.165979
2012-08-20	EQGS_50_equiH20	-36.8281	48.0501	-10.3695	-0.238204	54.89	9.22	0.023		-0.110469
2012-10-11	EQS 50C	-36.7095	27.1781	-30.5234	-0.487518	5.619	1.537	-0.055		-0.111521
2012-10-18	EQS 50C	-36.7101	48.4101	-9.92671	-0.257948	56.659	10.218	0.053		-0.135668
2012-11-02	EQS-50C	-36.7121	46.1465	-12.128	-0.28498	51.239	9.387	0.011		-0.135583
2012-11-08	EGS_50_tapwater	-36.663	45.1879	-13.0234	-0.309214	48.608	8.705	-0.013		-0.148787
2013-02-04	EQS-50C	-36.7223	48.3109	-10.0287	-0.252525	57.762	11.464	0.004		-0.128989
2013-02-19	EQG_50	-36.7791	23.2619	-34.5065	-0.652892	-4.5	-0.944	-0.181		-0.122393
2013-02-22	EQS_50	-36.7174	40.6685	-17.4962	-0.392466	40.263	9.38	-0.035		-0.123482
7-May-2013	EQS-50C	-36.69	47.29	-10.952	-0.287	23.044	5.34	0.025		-0.105458
25-May-2013	EQS-50C	-	-	33.77	0.462	-	-	-		-0.0977771
Equilibrated gases 80°C
date	HG name	d13C (pdb)	d18O (smow) raw	d47	D47	d48	D48	49 parameter
2013-02-21	EQS-80C	-36.6424	40.0009	-18.1992	-0.530935	37.813	8.295	-0.102		-0.251142
3-May-2013	EQS-80C	-36.72	42.57	-15.698	-0.464	44.944	10.238	0.024		-0.203787
13-May-2013	EQS-80C	-36.7	43.16	-15.129	-0.485	45.69	9.807	-0.021		-0.234219
31-May-2013	EQS-80C	-36.95	42.52	-15.922	-0.418	46.049	11.396	0.399		-0.154074
10-June-2013	EQS-80C	0.27	46.92	25.814	0.202	58.948	15.129	0.118		-0.225897

## Sheet: Machine1-Carrara Marble
Carrara Marble
				corrected for acid fractionation
date	Name	d13C (pdb)	d18O (smow) raw	d18O (smow)	d47	D47 raw	D47 linearity corrected	D47 abs ref. Frame	acid correction factor
2012-05-18	DGS_CarraraMarble	2.14839	37.5939	28.6349	17.789	-0.445907	-0.59528	0.368639	0.052
2012-05-22	DGS_CarraraMarble	2.14489	37.6116	28.6524	17.8195	-0.429818	-0.579447	0.385807	0.052
2012-05-26	DGS_CarraraMarble	2.18725	37.6109	28.6517	17.898	-0.396786	-0.547074	0.420909	0.052
2012-05-28	DGS_CarraraMarble	2.183	37.129	28.174	17.387	-0.424	-0.569997	0.396054	0.052
2012-06-19	DGS_CarraraMarble	2.12288	37.3787	28.4216	17.6137	-0.386707	-0.534608	0.434426	0.052
2012-07-16	DGS_CarraraMarble	2.1905	37.6736	28.7139	18.0151	-0.346414	-0.53449	0.395319	0.052
2012-07-22	DGS_CarraraMarble	2.13112	37.4284	28.4708	17.7011	-0.357303	-0.542101	0.385959	0.052
2012-07-23	DGS_CarraraMarble	2.18127	37.48	28.522	17.8036	-0.355637	-0.541504	0.386692	0.052
2012-08-17	DGS_CarraraMarble	2.1549	37.7166	28.7565	17.8862	-0.3768	-0.597128	0.331133	0.052
2012-08-18	DGS_CarraraMarble	2.1285	37.6792	28.7195	17.8842	-0.3166	-0.536904	0.398526	0.052
2012-09-04	DGS_CarraraMarble	2.12846	37.6792	28.7194	17.98	-0.347603	-0.569086	0.362513	0.052
2012-09-18	DGS_CarraraMarble	1.98	37.285	28.3287	17.2936	-0.36773	-0.580759	0.349451	0.052
2012-09-25	DGS_CarraraMarble	1.84937	36.8	27.8478	16.7087	-0.341825	-0.547648	0.386504	0.052
2012-09-26	DGS_CarraraMarble	2.0982	37.5053	28.5471	17.6517	-0.3457	-0.56314	0.369168	0.052
2012-10-02	DGS_CarraraMarble	2.115	37.6226	28.6633	17.7791	-0.3514	-0.570409	0.361033	0.052
2012-10-14	DGS_CarraraMarble	1.9476	37.265	28.3088	17.2352	-0.3743	-0.586609	0.342905	0.052
2012-10-17	DGS_CarraraMarble	2.119	37.8015	28.8407	17.9564	-0.356134	-0.577327	0.353292	0.052
2012-10-30	DGS_CarraraMarble	2.1325	37.5806	28.6217	17.7702	-0.336133	-0.555032	0.37824	0.052
2012-11-06	DGS_CarraraMarble	2.13425	37.6457	28.6863	17.8504	-0.322772	-0.542659	0.392086	0.052
2012-11-14	DGS_CarraraMarble	2.09725	37.625	28.6657	17.7664	-0.349353	-0.568206	0.363498	0.052
2012-12-04	DGS_CarraraMarble	2.032	37.405	28.4476	17.4746	-0.357597	-0.572855	0.358296	0.052
2012-12-18	DGS_CarraraMarble	2.08562	37.5721	28.6133	17.7177	-0.334025	-0.552278	0.381322	0.052
2013-01-08	DGS_CarraraMarble	2.10913	37.5604	28.6017	17.7551	-0.308589	-0.527303	0.40927	0.052
2013-01-10	DGS_CarraraMarble	2.15437	37.7085	28.7485	17.9699	-0.286017	-0.507376	0.431568	0.052
2013-01-14	DGS_CarraraMarble	2.203	37.807	28.8462	18.1128	-0.288867	-0.511986	0.426409	0.052
2013-01-16	DGS_CarraraMarble	1.99925	37.4691	28.5112	17.5491	-0.31544	-0.531616	0.404444	0.052
2013-01-22	DGS_CarraraMarble	2.12487	37.685	28.7252	17.8824	-0.320678	-0.540959	0.393988	0.052
2013-01-26	DGS_CarraraMarble	2.13437	37.8362	28.8752	18.0743	-0.289348	-0.511993	0.426402	0.052
2013-02-05	DGS_CarraraMarble	2.05	37.4701	28.5122	17.585	-0.330204	-0.546822	0.387428	0.052
2013-02-09	DGS_CarraraMarble	2.007	37.695	28.7351	17.768	-0.328	-0.546872	0.387371	0.052
2013-02-15	DGS_CarraraMarble	2.0365	37.3593	28.4023	17.4968	-0.295332	-0.564325	0.379115	0.052
2013-02-19	DGS_CarraraMarble	2.09362	37.5431	28.5846	17.7833	-0.248673	-0.522072	0.425621	0.052
2013-02-20	DGS_CarraraMarble	2.05775	37.4406	28.4829	17.6043	-0.289917	-0.560564	0.383255	0.052
2013-02-23	DGS_CarraraMarble	2.13	37.6	28.6409	17.853	-0.264	-0.53847	0.407572	0.052
2013-02-28	DGS_CarraraMarble	2.119	37.1556	28.793	17.3565	-0.313569	-0.580405	0.378416	0.069
2-Mar-2013	DGS_CarraraMarble	2.139	37.078	28.716	17.319	-0.294	-0.56026	0.400589	0.069
3-Mar-2013	DGS_CarraraMarble	2.115	37.208	28.845	17.439	-0.28	-0.548105	0.413967	0.069
2013-04-16	DGS_CarraraMarble	1.95	36.84	28.4799	16.91	-0.284	-0.564303	0.366543	0.069
2013-04-17	DGS_CarraraMarble	1.96	36.73	28.3708	16.857	-0.25	-0.529424	0.404828	0.069
2013-04-20	DGS_CarraraMarble	1.98	36.84	28.4799	16.951	-0.282	-0.562983	0.367992	0.069
2013-04-22	DGS_CarraraMarble	2.21			18.09	-0.238	-0.537863	0.395565	0.069
2013-05-26	DGS_CarraraMarble	2.13	37.22	28.8569	17.49	-0.277	-0.566917	0.363673	0.069
2013-05-27	DGS_CarraraMarble	2.03	36.98	28.6188	17.15	-0.272	-0.556281	0.375348	0.069
2013-06-07	DGS_CarraraMarble	2.11	37.14	28.7775	17.39	-0.266	-0.554259	0.377567	0.069
2013-06-15	DGS_CarraraMarble	2.05	36.96	28.599	17.16	-0.251	-0.535447	0.398217	0.069
2013-06-17	DGS_CarraraMarble	1.99	36.91	28.5494	17.05	-0.264	-0.546624	0.385949	0.069
2013-06-18	DGS_CarraraMarble	2	36.94	28.5791	17.07	-0.283676	-0.566632	0.363987	0.069
2013-06-22	DGS_CarraraMarble	2.03	37.03	28.6684	17.21	-0.258	-0.543276	0.389624	0.069
2013-06-24	DGS_CarraraMarble	2.01	36.99	28.6287	17.15	-0.265	-0.549281	0.383032	0.069
2013-06-29	DGS_CarraraMarble	1.84	36.47	28.1129	16.45	-0.267	-0.570287	0.390792	0.069
2013-07-06	DGS_CarraraMarble	2.12	37.17	28.8073	17.43	-0.274	-0.595355	0.363487	0.069
2013-07-28	DGS_CarraraMarble	2.15	37.24	28.8767	17.629	-0.176	-0.58834	0.381272	0.069
2013-07-29	DGS_CarraraMarble	2.16	37.26	28.8965	17.65	-0.18	-0.592831	0.376369	0.069
2013-07-30	DGS_CarraraMarble	2.14	37.28	28.9164	17.657	-0.177	-0.589995	0.379465	0.069
2013-08-03	DGS_CarraraMarble	2.14	37.24	28.8767	17.603	-0.187	-0.598732	0.369929	0.069
2013-08-05	DGS_CarraraMarble	2	37.51	29.1445	17.768	-0.16	-0.575591	0.395187	0.069
2013-08-06	DGS_CarraraMarble	2.16	37.18	28.8172	17.573	-0.182	-0.59303	0.376152	0.069
2013-08-20	DGS_CarraraMarble	2.32	37.54	29.1743	18.087	-0.179	-0.602052	0.366304	0.069
2013-09-07	DGS_CarraraMarble	2.21	37.42	29.0552	17.858	-0.18	-0.597696	0.371059	0.069
2013-10-01	DGS_CarraraMarble	2.12	37.22	28.8569	17.81	0.051	-0.598306	0.401	0.069
2013-10-11	DGS_CarraraMarble	2.02	36.91	28.5494	17.38	0.086	-0.562674	0.436	0.069
2013-10-30	DGS_CarraraMarble	2.1	37.21	28.8469	17.881	0.078	-0.590524	0.408	0.069
2013-11-01	DGS_CarraraMarble	2.14	37.32	28.956	17.961	0.08	-0.590802	0.407	0.069
2013-11-12	DGS_CarraraMarble	2	37.1	28.7378	17.585	0.068	-0.617441	0.384	0.069
2013-11-27	DGS_CarraraMarble	2.15	37.41	29.0453	18.13	0.15	-0.557972	0.442	0.069
2014-01-22	DGS_CarraraMarble	2.17	37.42	29.0552	18.077	0.07	-0.624641	0.37	0.069
2014-01-29	DGS_CarraraMarble	2.16	37.25	28.8866	17.903	0.079	-0.604113	0.389	0.069
2014-02-03	DGS_CarraraMarble	2.14	37.28	28.9164	17.961	0.125	-0.560326	0.433	0.069
2014-02-10	DGS_CarraraMarble	2.1	37.14	28.7775	17.834	0.174	-0.508963	0.471	0.069
2014-02-13	DGS_CarraraMarble	1.95	36.74	28.3807	17.185	0.071	-0.585725	0.39	0.069
2014-02-18	DGS_CarraraMarble	1.87	36.47	28.1129	16.796	0.036	-0.604614	0.372	0.069
2014-02-19	DGS_CarraraMarble	1.95	36.71	28.351	17.124	0.047	-0.606125	0.371	0.069
2014-02-24	DGS_CarraraMarble	1.82	36.36	28.0038	16.674	0.076	-0.569662	0.39	0.069
2014-02-27	DGS_CarraraMarble	2.07	37.11	28.7477	17.63	0.111	-0.567292	0.392	0.069

## Sheet: Machine1-ETH3
ETH3
Carbonate standard provided by Stefano Bernasconi, ETH Zurich
				corrected for acid fractionation
Date	Name	d13C (pdb)	d18O (smow) raw	d18O (smow)	d18O pdb	d47	D47 raw	d48	D48	49 parameter	D47 linearity corrected	D47 abs.ref frame	acid correction
2013-07-02	ETH-3	1.32	36.29	27.93	-3.48	16.058	0.021	29.59	7.27	0	-0.27506	0.71236	0.069
2013-06-26	ETH-3	1.25	36.18	27.83	-3.58	15.881	0.016	30.13	8.05	0.13	-0.276797	0.710468	0.069
2013-06-30	ETH-3	1.4	36.5	28.14	-3.27	16.347	0.022	30.2	7.51	0.04	-0.279388	0.707645	0.069
2013-07-04	ETH-3	1.77	37.39	29.03	-2.42	17.62	0.038	33.88	9.37	0.17	-0.286858	0.699509	0.069
2013-07-07	ETH-3	1.71	37.25	28.89	-2.55	17.411	0.029	32.05	7.86	0.05	-0.292005	0.693903	0.069
2013-06-14	ETH-3	1.61	37.11	28.75	-2.68	17.16	0.009	31.65	7.74	0.06	-0.275006	0.712419	0.069
2013-07-30	ETH-3	1.77	37.43	29.07	-2.38	17.74	0.12	34.53	9.93	0.16	-0.294936	0.701528	0.069
2013-07-30	ETH-3	1.78	37.38	29.02	-2.43	17.68	0.101	34.844	10.33	0.052	-0.312533	0.682321	0.069
2013-08-01	DGS_ETH3	1.79	37.4	29.04	-1.82807	17.72	0.113	34.555	10.014	0.043	-0.301468	0.694398	0.069
2013-08-04	DGS_ETH3	1.77	37.26	28.9	-1.96278	17.561	0.11	33.917	9.669	0.084	-0.300749	0.695182	0.069
2013-08-08	DGS_ETH3	1.79	37.36	29	-1.86656	17.692	0.122	33.603	9.159	0.076	-0.291813	0.704936	0.069
2013-08-11	DGS_ETH3	1.81	37.42	29.06	-1.80883	17.803	0.147	34.928	10.33	0.034	-0.26941	0.72939	0.069
2013-08-15	DGS_ETH3	1.77	37.51	29.14	-1.72223	17.825	0.121	35.398	10.616	0.127	-0.295924	0.700449	0.069
2013-08-18	DGS_ETH3	1.74	37.26	28.9	-1.96278	17.558	0.128	34.407	10.134	0.12	-0.282679	0.714906	0.069
2013-08-29	DGS_ETH3	1.75	37.29	28.93	-1.93391	17.592	0.127	34.273	9.954	0.074	-0.284474	0.712947	0.069
2013-09-12	DGS-ETH3	1.52388	36.809	28.45	-2.39673	16.8728	0.109761	33.0937	9.73548	0.0372706	-0.284892	0.712491	0.069
10-Oct-2013	ETH-3	1.68	37.23	28.87	-2.57	17.65	0.316	44.3	19.89	0.05	-0.340424	0.654294	0.069
22-Oct-2013	ETH-3	1.75	37.34	28.98	-2.47	17.94	0.426	49.34	24.56	0.16	-0.244805	0.759317	0.069
30-Oct-2013	ETH-3	1.77	37.59	29.22	-2.22	18.15	0.361	49.16	23.9	0.09	-0.317469	0.685363	0.069
31-Oct-2013	ETH-3	1.64	37.21	28.85	-2.59	17.62	0.349	46.58	22.17	0	-0.309878	0.693089	0.069
2013-11-04	ETH-3	1.56	37.1	28.74	-2.7	17.48	0.392	47.09	22.84	0.01	-0.260801	0.74222	0.069
2013-11-07	ETH-3	1.6	37.27	28.91	-2.53	17.67	0.374	46.79	22.22	0	-0.312511	0.699181	0.069
2013-11-11	ETH-3	1.78	37.6	29.23	-2.22	18.2	0.394	49.82	24.25	0.15	-0.31318	0.698493	0.069
2013-11-22	ETH-3	1.79	37.53	29.16	-2.28	18.11	0.373	50.42	25.26	0.07	-0.329605	0.676182	0.069
2013-11-30	ETH-3	1.76	37.6	29.23	-1.64	18.198	0.407	51.09	25.75	0.13	-0.303628	0.71452	0.069
2014-01-23	ETH-3	1.67	37.45	29.09	-1.78	17.893	0.345	44.85	19.97	-0.03	-0.337732	0.656188	0.069
2014-01-27	ETH-3	1.76	37.66	29.29	-1.58	18.248	0.406	47.3	21.95	0.05	-0.292817	0.697823	0.069
2014-01-31	ETH-3	1.75	37.42	29.06	-1.81	17.98	0.377	46.87	21.99	0.3	-0.311554	0.679251	0.069
2014-02-05	ETH-3	1.77	37.55	29.18	-1.68	18.179	0.428	49.07	24.11	0.17	-0.266711	0.7238	0.069
2014-02-11	ETH-3	1.54	36.76	28.4	-2.44	17.061	0.331	44.27	20.75	0.05	-0.319604	0.652233	0.069
2014-02-14	ETH-3	1.74	37.51	29.14	-1.72	18.083	0.409	48.29	23.21	0.33	-0.280576	0.673912	0.069
2014-02-19	ETH-3	1.37	36.43	28.07	-2.76	16.555	0.318	42.71	19.88	0.15	-0.313423	0.638869	0.069
2014-02-25	ETH-3	1.78	37.51	29.14	-1.72	18.122	0.405	47.15	22.09	0.15	-0.296733	0.625323	0.069

## Sheet: Machine 1- ETF
Transfer functions
used to transfer from laboratory frame into equilibrated gas frame (Dennis et al., 2011)
April to July 2012
	D47 laboratory frame	Absolute ref. frame	Reference				Transfer function
Equilibrated gas 25°C	-0.0481822	0.924	Wang et al., 2004				slope	intercept
Equilibrated gas 50°C	-0.131	0.804	Wang et al., 2004				1.08431	0.962105
Heated Gas	-0.864247	0.0266	Wang et al., 2004
July 2012 - August 2012
	D47 laboratory frame	Absolute ref. frame	Reference				Transfer function
Equilibrated gas 25C	n/a	0.924	Wang et al., 2004				slope	intercept
Equilibrated gas 50C	-0.159905	0.804	Wang et al., 2004				1.22984	1.00066
Heated Gas	-0.792018	0.0266	Wang et al., 2004
August 2012-Feb 2013
	D47 laboratory frame	Absolute ref. frame	Reference				Transfer function
Equilibrated gas 25C	-0.02	0.924	Wang et al., 2004				slope	intercept
Equilibrated gas 50C	-0.128503	0.804	Wang et al., 2004
Heated Gas	-0.822745	0.0266	Wang et al., 2004				1.11903	0.947337
Feburary 2013 - April 2013
	D47 laboratory frame	Absolute Ref. frame	Reference				Transfer function
Equilibrated gas 25C	-0.0201945	0.924	Wang et al., 2004				slope	intercept
Equilibrated gas 50C	-0.122937	0.804	Wang et al., 2004				1.10065	0.948239
Heated Gas	-0.834854	0.0266	Wang et al., 2004
Equilibrated gas 80C	-0.251142	0.685517	Wang et al., 2004
April 2013 - 26. June 2013
	D47 laboratory frame	Absolute Ref. frame	Reference				Transfer function
Equilibrated gas 25C	0.000532719	0.924	Wang et al., 2004				slope	intercept
Equilibrated gas 50C	-0.101617	0.804	Wang et al., 2004				1.09767	0.916959
Heated Gas	-0.812902	0.0266	Wang et al., 2004
Equilibrated gas 80C	-0.204495	0.685517	Wang et al., 2004
28.June 2013 - 15.July 2013
	D47 laboratory frame	Absolute Ref. frame	Reference				Transfer function
Heated Gas	-0.839386	0.0266	Wang et al., 2004				slope	intercept
Carrara Marble	-0.583	0.312	Dennis et al., 2011				1.08922	0.942961
ETH-3	-0.282022	0.634	Stefano Bernasconi, pers. Commun.
Carbonates not acid corrected
July 2013 - September 2013
	D47 laboratory frame	Absolute Ref. frame	Reference				Transfer function
Heated Gas	-0.848063	0.0266	Wang et al., 2004				slope	intercept
Carrara Marble	-0.592283	0.312	Dennis et al., 2011				1.09152	0.954456
ETH-3	-0.291888	0.634	Stefano Bernasconi, pers. Commun.
September 2013 onwards:
	moving averages
	From	To	Slope ETF	Intercept ETF
	2013-09-24	2013-10-24	0.924072	0.897545
	2013-09-24	2013-10-24	0.924072	0.897545
	2013-09-24	2013-11-08	0.981889	0.919615
	2013-09-24	2013-11-09	0.980581	0.919108
	2013-09-24	2013-11-10	0.980581	0.919108
	2013-09-24	2013-11-16	1.00466	0.930622
	2013-09-24	2013-11-23	1.01774	0.939464
	2013-09-26	2013-11-25	1.01774	0.939464
	2013-10-03	2013-12-02	1.01464	0.93784
	2013-10-06	2013-12-05	1.01464	0.93784
	2013-10-10	2013-12-09	1.02826	0.951524
	2013-10-15	2013-12-14	1.03498	0.954263
	2013-10-20	2013-12-19	1.03048	0.946834
	2013-10-27	2013-12-26	1.07212	0.971045
	2013-11-02	2014-01-01	1.0697	0.973769
	2013-11-07	2014-01-06	1.09883	0.99474
	2014-01-21	2014-02-20	1.01734	0.932244
	2014-01-21	2014-02-21	0.996672	0.923796
	2014-01-21	2014-02-21	0.996672	0.923796
	2014-01-21	2014-02-24	0.996163	0.922672
	2014-01-21	2014-02-27	0.99117	0.919054
	2014-01-21	2014-03-08	0.992589	0.919535
	2014-01-21	2014-03-14	0.958415	0.889546
	2014-01-21	2014-03-19	0.929167	0.865615
	2014-01-22	2014-03-23	0.916539	0.857134
	2014-01-27	2014-03-28	0.861691	0.812015

## Sheet: Machine 1 -Samples
Summary sample analysis
Machine 1
Code Table 1, Sample Code	Measurement date	d47	D47 raw	D47 linearity corrected	D47 abs	acid correction factor	d18O pdb	d13C		d48	D48	mass 49 parameter
NA-1, 23C-Salt	2.11.2012	-8.604	-0.389	-0.282844	0.682637	0.052	-8.47381	-18.198		3.22138	15.0594	-0.022
NA-1, 23C-Salt	16.11.2012	-8.568	-0.38	-0.274288	0.692212	0.052	-8.4892	-18.155		8.27271	20.1383	-0.023
NA-1, 23C-Salt	4.2.2013	-8.959	-0.386	-0.275464	0.690888	0.052	-8.76134	-18.266		2.62319	13.8669	-0.014
NA-3, 37C-Salt	3.10.2012	-13.699	-0.491	-0.321982	0.638729	0.052	-11.2914	-20.389		9.89086	16.0062	0.003
NA-4, 37C-Salt	23.8.2013	-22.015	-0.833	-0.31796	0.676274	0.069	-13.2791	-26.05		0.695661	1.531	-0.047
NA-4, 37C-Salt	24.10.2013	-23.016	-1.24	-0.379492	0.622241	0.069	-13.6774	-26.254		0.0434912	0.0704332	-0.101
NA-4, 37C-salt	2014-01-24	-21.875	-1.117	-0.276414	0.716318	0.069	-12.9317	-25.89		2.645	1.093	0.04
NA-5, 50C-Salt	21.6.2012	-16.984	-0.515	-0.372387	0.610324	0.052	-13.6676	-21.3726		0.741705	2.26189	-0.023
NA-5, 50C-Salt	30.7.2012	-17.429	-0.55	-0.368089	0.600023	0.052	-14.032	-21.4142		1.26089	2.03965	-0.036
NA-6, 50C-Salt	23.8.2013	-22.907	-0.887	-0.351092	0.640105	0.069	-14.8917	-25.23		-1.07032	-3.49443	-0.041
NA-6, 50C-Salt	7.11.2013	-23.945	-1.286	-0.391709	0.617744	0.069	-15.316	-25.453		-3.20887	-6.48538	-0.064
NA-7, 70C-Salt	21.7.2012	-20.893	-0.62	-0.401934	0.558409	0.052	-17.09	-21.7239		-0.768071	-6.17885	-0.05
NA-7, 70C-Salt	6.11.2012	-20.716	-0.628	-0.372407	0.582148	0.052	-16.8458	-21.683		2.17672	-3.04599	-0.037
NA-7, 70C-Salt	28.11.2012	-20.726	-0.62	-0.364283	0.591238	0.052	-16.8131	-21.736		41.2934	35.9355	-0.013
NA-8, 80C-Salt	31.10.2012	-25.454	-0.738	-0.423949	0.524366	0.052	-17.5213	-25.857		-0.218969	-6.63164	-0.062
NA-8, 80C-Salt	14.11.2012	-25.311	-0.682	-0.369714	0.585061	0.052	-17.5348	-25.752		-0.704325	-7.14055	-0.048
NA-8, 80C-Salt	17.1.2013	-25.589	-0.716	-0.400284	0.550846	0.052	-17.5771	-25.961		-1.42167	-7.93875	-0.055
NA-9,90C-Salt	21.7.2012	-26.233	-0.686	-0.412199	0.545802	0.052	-19.2855	-24.9096		-1.37563	-11.1786	-0.056
NA-9,90C-Salt	7.11.2012	-26.137	-0.726	-0.403523	0.547209	0.052	-19.1249	-24.833		-1.70523	-11.4702	-0.058
NA-9,90C-Salt	13.12.2012	-26.359	-0.742	-0.416783	0.532365	0.052	-18.9816	-25.197		-0.00722508	-9.50045	-0.075
NA-9,90C-Salt	21.10.2013	-27.712	-1.496	-0.45992	0.540385	0.069	-19.3688	-24.924		-10.8532	-22.1434	-0.1
NA-9,90C-Salt	2.12.2013	-27.875	-1.547	-0.450035	0.561366	0.069	-19.2716	-25.145		-11.6474	-22.7362	-0.114

## Sheet: Machine 2- heated gases
Heated gases
date	HG name		d13C (pdb)	d18O (smow) raw	d47	D47 raw	d48	D48	49 param.
9-May-2013	HGS+3		-2.92	23.91	-1.266	-0.776	-1.996	0.295	0.598
10-May-2013	HGS+10		6.29	22.64	6.332	-0.828	-4.831	-0.108	0.238
22-May-2013	HGS-33		-36.91	8.73	-48.907	-0.932	-32.476	-0.728	-0.081
24-May-2013	HGS-33		-36.59	9.3	-47.954	-0.904	-31	-0.471	-0.044
24-May-2013	HGS+10		2.79	25.46	5.765	-0.813	0.869	0.126	0.263
25-May-2013	HGS+3		-14.06	28.4	-7.666	-0.791	7.243	0.821	0.61
29-May-2013	HGS-33		-36.91	8.82	-48.807	-0.927	-32.138	-0.56	0.069
4-June-2013	HGS+13		0.91	28.66	7.145	-0.802	7.305	0.311	0.337
2013-06-25	HGS-33		3.39	26.99	7.89	-0.803	3.863	0.118	0.189
2013-06-25	HGS+13		-36.84	8.92	-48.653	-0.93	-32.1	-0.726	-0.056
2013-07-03	HGS+11		0.75	29.43	7.73	-0.826	8.433	-0.054	0.242
2013-07-05	HGS-CM		2.07	32.69	12.245	-0.851	14.991	0.088	0.082
2013-07-08	HGS_+11		1.02	28.06	6.666	-0.786	6.113	0.295	0.412
2013-07-12	HGS_HP		-36.87	8.95	-48.701	-0.986	-31.995	-0.668	-0.058
2013-07-16	HGS_+1		-13.95	31.55	-4.486	-0.816	13.18	0.59	0.538
2013-07-18	HGS_+14		5.14	27.17	9.784	-0.788	4.854	0.759	0.419

## Sheet: Machine 2- equilibrated gases
Equilibrated gases
RAW DATA
Equilibrated gases 80°C
date	HG name	d13C (pdb)	d18O (smow) raw	d47	D47 raw
27-May-2013	EQS-80C	-36.98	45.54	-12.985	-0.267		-0.237517
30-May-2013	EQS-80C	-37.09	42.56	-15.964	-0.283		-0.246753

## Sheet: Machine 2 Carrara Marble
Carrara Marble
date	Name	d13C (pdb)	d18O (smow) raw	d47	D47 raw	D47 linearity corrected	D47 abs ref. Frame
17-May-2013	Carrara Marble	1.98	36.88	16.596	-0.588	-0.625682	0.343308
2013-05-26	Carrara Marble	2.13	37.23	17.119	-0.562	-0.60087	0.373525
2013-05-26	Carrara Marble	2.05	37.1	16.873	-0.598	-0.636311	0.330364
2013-05-27	Carrara Marble	2.03	37	16.77	-0.588	-0.626077	0.342827
2013-05-30	Carrara Marble	2.14	37.24	17.158	-0.544	-0.582958	0.395338
2013-06-29	Carrara Marble	1.84	36.51	16.139	-0.541	-0.577645	0.401809
2013-07-06	Carrara Marble	2.11	37.15	17.014	-0.574	-0.612631	0.359202
2013-07-19	Carrara Marble	2.089	37.196	17.01	-0.582	-0.620622	0.34947

## Sheet: Machine 2 ETH3
ETH3
Carbonate standard provided by Stefano Bernasconi, ETH Zurich
Date	Name	d13C (pdb)	d18O (smow) raw		d47	D47	D47 linearity corrected	D47 abs.	acid correction
2013-07-19	ETH-3	1.75	37.41		17.212	-0.29	-0.329081	0.704516	0.069
2013-07-19	ETH-3	1.62	37.06		16.732	-0.279	-0.316991	0.71924	0.069
2013-07-19	ETH-3	1.69	37.32		17.065	-0.279	-0.317747	0.718319	0.069
2013-07-20	ETH-3	1.74	37.43		17.216	-0.292	-0.33109	0.70207	0.069

[truncated: 2 more sheets: Machine 2- ETF, Machine 2- Samples]
